# Supplementary material for: Rational design of BINOL-based diimidazolyl ligands: homochiral channel-like mono-component organic frameworks by hydrogen-bond-directed self-assembly
Source: Royal Society of Chemistry journal article supplement (doi:10.1039/c1ob00026h), 2011-01-01

# *Supporting Information*

## **Rational Design of BINOL-Based Diimidazolyl Ligands: Homochiral Channel-like Mono-Component Organic Frameworks by Hydrogen-Bond-Directed Self-Assembly**

*Li Yang,<sup>b</sup> Fei Yang,<sup>a</sup> Jingbo Lan,<sup>a</sup> Ge Gao,<sup>a</sup> Jingsong You\*<sup>a</sup> and Xiaoyu Su\*<sup>a</sup>*

<sup>a</sup> *Key Laboratory of Green Chemistry and Technology of Ministry of Education, College of Chemistry, Sichuan University, 29 Wangjiang Road, Chengdu 610064, People's Republic of China; E-mail: jsyou@scu.edu.cn*

<sup>b</sup> *State Key Laboratory Cultivation Base for Nonmetal Composites and Functional Materials, National Engineering Technology Center for Insulation Materials, Southwest University of Science and Technology, Mianyang 621010, People's Republic of China*

### **Table of contents**

|                                                                                                                                 |     |
|---------------------------------------------------------------------------------------------------------------------------------|-----|
| <b>I.</b> General remarks.....                                                                                                  | S2  |
| <b>II.</b> Procedures for the preparation of chiral ligands ( <i>R</i> )- <b>1-3</b> .....                                      | S3  |
| <b>III.</b> General procedure for the preparation of organic crystals ( <i>R</i> )- <b>1-3</b> .....                            | S8  |
| <b>IV.</b> Single-crystal X-ray diffraction determination and refinement.....                                                   | S8  |
| <b>V.</b> Powder X-ray diffraction analysis of ( <i>R</i> )- <b>1-3</b> .....                                                   | S10 |
| <b>VI.</b> References.....                                                                                                      | S11 |
| <b>VII.</b> Copies of <sup>1</sup> H and <sup>13</sup> C NMR spectra of ( <i>R</i> )- <b>1-3</b> , <b>9</b> and <b>12</b> ..... | S12 |

## I. General remarks

$^1\text{H}$  NMR spectra were obtained with a Bruker AV-400 (400 MHz) or a Varian Inova-400 (400 MHz) spectrometer, while  $^{13}\text{C}$  NMR spectra were also recorded with a Bruker AV-400 (100 MHz), a Bruker AV-600 (150 MHz), a Varian Inova-400 (100 MHz) or a Varian Inova-600 (150 MHz) spectrometer. The  $^1\text{H}$  NMR chemical shifts were measured relative to tetramethylsilane,  $\text{CDCl}_3$  or  $\text{DMSO}-d_6$  as the internal reference, while the  $^{13}\text{C}$  NMR chemical shifts were recorded with  $\text{CDCl}_3$  or  $\text{DMSO}-d_6$  as the internal standard. Elemental analyses were performed with a CARLO ERBA1106 instrument or a Heraeus CHN-O-RAPID instrument. The ESI-TOF mass spectra were recorded with a Waters Q-ToF premier instrument. High-resolution FAB mass spectra was obtained using a JEOL JMS-SX/SX 102A instrument. The optical rotations were determined with a WZZ-2B polarimeter. Melting points were determined with XRC-1 and are uncorrected. Powder X-ray diffraction (PXRD) patterns were collected on a Philips X'PERT Pro MPDX powder diffractometer with  $\text{Cu K}\alpha$  radiation (1.54056 Å). The tube voltage and amperage were set at 40 kV and 35 mA, respectively. The sample was scanned between  $5^\circ$  and  $45^\circ$  in  $2\theta$  with a step size of  $0.03^\circ$ . The simulated PXRD spectra from single-crystal structures was carried out using Mercury (version 1.4.2, 2002) and were compared to confirm the composition of the crystal with the experimental PXRD pattern.

**Materials:** (*R*)-1,1'-Bi-2-naphthol [(*R*)-4] (>99% ee) was purchased from Lian YunGang Chiral Chemicals (China) Co., Ltd. Pyridine was distilled before use, while the others were used without further purification. Solvents were dried by heating at reflux for at least 24h over  $\text{CaH}_2$  (dichloromethane and DMSO) or sodium/benzophenone (tetrahydrofuran and diethyl ether) and were freshly distilled prior to use. Unless otherwise indicated, all syntheses and manipulations were carried out under a dry nitrogen atmosphere. *n*BuLi in  $\text{Et}_2\text{O}$  was prepared according to the

literature.<sup>1</sup> Compounds (*R*)-5, (*R*)-6 and (*R*)-7 were synthesized according to literature methods.<sup>2</sup> Compound (*R*)-8 was synthesized by following literature procedures.<sup>3</sup> Compounds (*R*)-10 and (*R*)-11 were prepared according to literature procedures.<sup>4</sup>

## II. Procedures for the preparation of chiral ligands (*R*)-1-3

### i. Synthesis of chiral ligand (*R*)-1

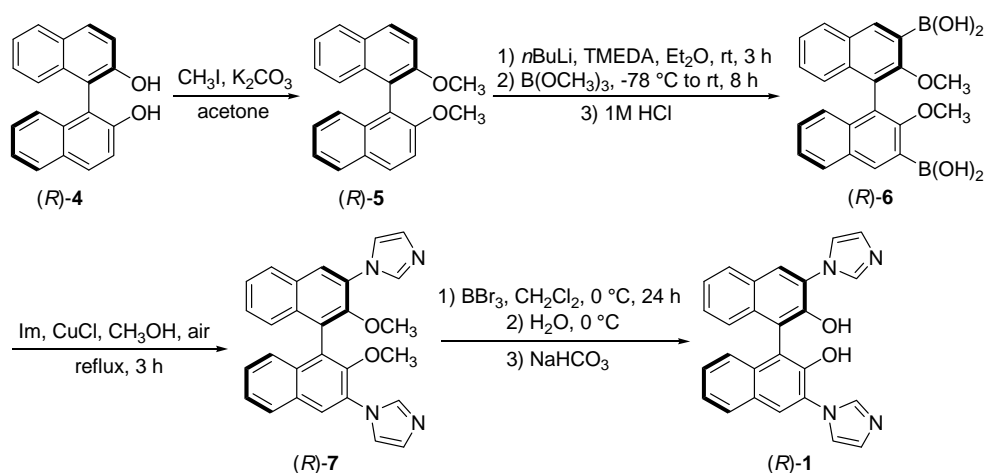

**Scheme S1** Synthesis of the 3,3' -diimidazolyl-substituted BINOL (*R*)-1.

### (*R*)-3,3' -Bis(1*H*-imidazol-1-yl)-1,1' -bi-2-naphthol ((*R*)-1)

A flame-dried Schlenk flask was charged with (*R*)-7 (0.47 g, 1 mmol) and anhydrous  $\text{CH}_2\text{Cl}_2$  (20 mL) under  $\text{N}_2$ . The solution was cooled to  $0\text{ }^\circ\text{C}$ , and then  $\text{BBr}_3$  (1.0 M in  $\text{CH}_2\text{Cl}_2$ , 4 mL, 4 mmol) was added over a period of 30 min. The mixture was allowed to warm to room temperature and stirred for 24 h. Thereafter, water (5 mL) was carefully added at  $0\text{ }^\circ\text{C}$  to quench the reaction, followed by MeOH (5 mL) and solid  $\text{NaHCO}_3$  to neutralize the mixture. The resulting mixture was stirred for a further 12 h at room temperature and then filtered through a pad of Celite. The filtrate was washed with saturated aqueous NaCl solution (10 mL). The organic layer was separated, and the aqueous phase was extracted with  $\text{CH}_2\text{Cl}_2$  ( $2 \times 10$  mL). The combined organic layers were dried over  $\text{Na}_2\text{SO}_4$

and concentrated under reduced pressure. The resulting residue was purified by flash column chromatography on silica gel eluting with CH<sub>2</sub>Cl<sub>2</sub>/MeOH (12:1 to 10:1) to give (*R*)-**1** (0.36 g, 85%) as a pale-yellow solid. M.p. > 300 °C; [ $\alpha$ ]<sub>D</sub><sup>20</sup> = +30.2 (c = 0.51, DMSO); <sup>1</sup>H NMR (400 MHz, DMSO-*d*<sub>6</sub>):  $\delta$  6.93 (d, *J* = 8.4 Hz, 2H), 7.11 (s, 2H), 7.27 (t, *J* = 6.8 Hz, 2H), 7.36 (t, *J* = 8.0 Hz, 2H), 7.62 (s, 2H), 7.97 (d, *J* = 8.0 Hz, 2H), 8.07 (s, 2H), 8.13 (s, 2H) ppm; <sup>13</sup>C NMR (150 MHz, DMSO-*d*<sub>6</sub>):  $\delta$  116.4, 120.8, 121.5, 123.6, 124.1, 126.7, 127.8, 127.9, 128.1, 132.9, 135.0, 137.7, 148.4 ppm; HRMS (FAB): calcd for C<sub>26</sub>H<sub>19</sub>N<sub>4</sub>O<sub>2</sub> [M+H]<sup>+</sup>: 419.1508, found: 419.1505; Anal. Calcd. for C<sub>26</sub>H<sub>18</sub>N<sub>4</sub>O<sub>2</sub>: C, 74.63; H, 4.34; N, 13.39. Found: C, 74.38; H, 4.45; N, 13.20.

## ii. Synthesis of chiral ligand (*R*)-**2**

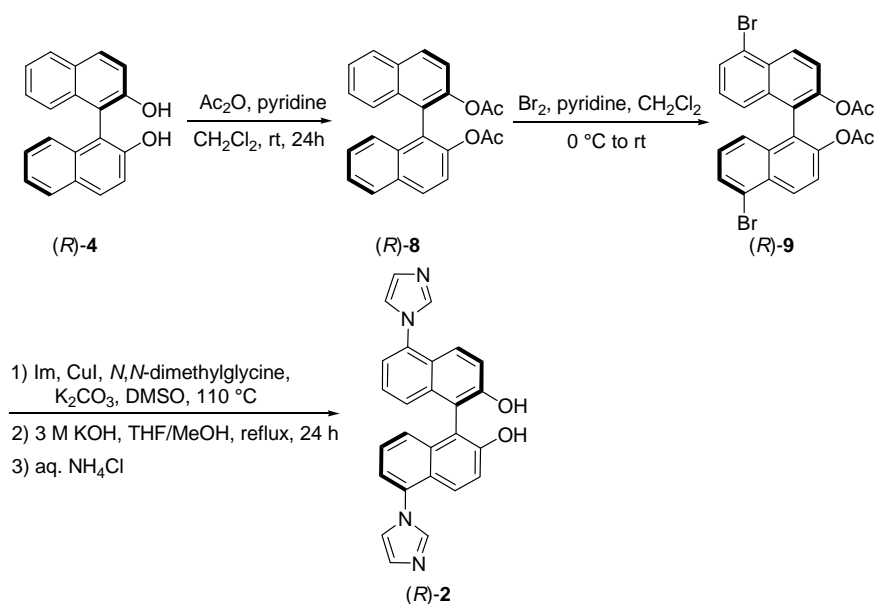

**Scheme S2** Synthesis of the 5,5'-diimidazolyl-substituted BINOL (*R*)-**2**.

### (*R*)-5,5' -Dibromo-2,2' -diacetoxy-1,1' -dinaphthyl ((*R*)-**9**)

A solution of bromine (4.6 mL, 90 mmol) in CH<sub>2</sub>Cl<sub>2</sub> (50 mL) was added dropwise to a stirred solution of (*R*)-**8** (5.56 g, 15 mmol) and pyridine (3.6 mL, 45 mmol) in CH<sub>2</sub>Cl<sub>2</sub> (150 mL) at room temperature. After stirring for 81 h, 200 mL of 15% aqueous solution of sodium bisulfite was carefully added at 0 °C to quench the reaction. The resulting mixture was stirred for an additional 2 h

at room temperature. The organic layer was separated, washed with NaHSO<sub>3</sub> (15%, 2×100 mL) and brine (2×100 mL), and then dried over Na<sub>2</sub>SO<sub>4</sub> and concentrated under reduced pressure. The resulting residue was purified by flash column chromatography on silica gel eluting with petroleum ether/ethyl acetate (13:1) to give (*R*)-**9** (3.33 g, 42%) as a white foam. M.p. 123-124 °C; [ $\alpha$ ]<sub>D</sub><sup>20</sup> = +32.0 (c = 0.50, CH<sub>2</sub>Cl<sub>2</sub>); <sup>1</sup>H NMR (400 MHz, CDCl<sub>3</sub>):  $\delta$  1.89 (s, 6H), 7.08-7.15 (m, 4H), 7.52 (d, *J* = 8.8 Hz, 2H), 7.76 (d, *J* = 7.2 Hz, 2H), 8.45 (d, *J* = 9.2 Hz, 2H) ppm; <sup>13</sup>C NMR (100 MHz, CDCl<sub>3</sub>):  $\delta$  20.5, 122.9, 123.2, 123.3, 125.9, 127.2, 129.1, 129.9, 130.0, 134.4, 147.4, 169.0 ppm; HRMS (ESI): calcd for C<sub>24</sub>H<sub>17</sub>Br<sub>2</sub>O<sub>4</sub> [M+H]<sup>+</sup>: 528.9473, found: 528.9456.

**(*R*)-5,5' -Bis(1*H*-imidazol-1-yl)-1,1' -bi-2-naphthol ((*R*)-**2**)**

A flame-dried Schlenk flask was charged with CuI (457 mg, 2.4 mmol), *N,N*-dimethylglycine (495 mg, 4.8 mmol), K<sub>2</sub>CO<sub>3</sub> (11.59 g, 84 mmol), (*R*)-**9** (6.34 g, 12 mmol), imidazole (2.86 g, 42 mmol), and DMSO (18 mL) at room temperature under nitrogen. After being heated at 110 °C for 60 h, the mixture was evaporated under vacuum. Thereafter, the resulting residue was partitioned with 200 mL of CH<sub>2</sub>Cl<sub>2</sub> and filtered through a pad of Celite. The filtrate was removed under reduced pressure to give the crude product. Aqueous KOH (3 *M*, 15 mL) was then added to the solution of the crude product in THF (80 mL) and methanol (40 mL). The resulting solution was refluxed for 24 h until the conversion of reactant was complete. The solution was then cooled to room temperature and neutralized by addition of saturated aqueous NH<sub>4</sub>Cl solution. The resulting mixture was stirred for a further 2 h and volatiles were then removed in *vacuo*. The aqueous phase was extracted with CH<sub>2</sub>Cl<sub>2</sub> (3×120 mL). The combined organic layers were dried over Na<sub>2</sub>SO<sub>4</sub> and evaporated under vacuum. The resulting residue was purified by flash column chromatography on silica gel eluting with CH<sub>2</sub>Cl<sub>2</sub>/MeOH (13:1 to 8:1) to give (*R*)-**2** (3.41 g, 68% (two steps)) as a pale-yellow solid. M.p.

>300 °C;  $[\alpha]_{\text{D}}^{20} = +39.0$  ( $c = 0.50$ , DMSO);  $^1\text{H NMR}$  (400 MHz, DMSO- $d_6$ ):  $\delta$  7.09 (d,  $J = 7.6$  Hz, 2H), 7.23 (s, 2H), 7.32-7.37 (m, 4H), 7.41 (d,  $J = 8.8$  Hz, 2H), 7.47 (d,  $J = 9.2$  Hz, 2H), 7.62 (s, 2H), 8.03 (s, 2H), 9.69 (s, 2H) ppm;  $^{13}\text{C NMR}$  (100 MHz, DMSO- $d_6$ ):  $\delta$  115.8, 120.0, 120.4, 122.2, 123.2, 123.8, 125.3, 125.8, 128.9, 134.2, 134.9, 138.6, 153.9 ppm; HRMS (ESI): calcd for  $\text{C}_{26}\text{H}_{19}\text{N}_4\text{O}_2$   $[\text{M}+\text{H}]^+$ : 419.1508, found: 419.1517; Anal. Calcd. for : C, 74.63; H, 4.34; N, 13.39. Found: C, 74.26; H, 4.36; N, 13.10.

### iii. Synthesis of chiral ligand (*R*)-3

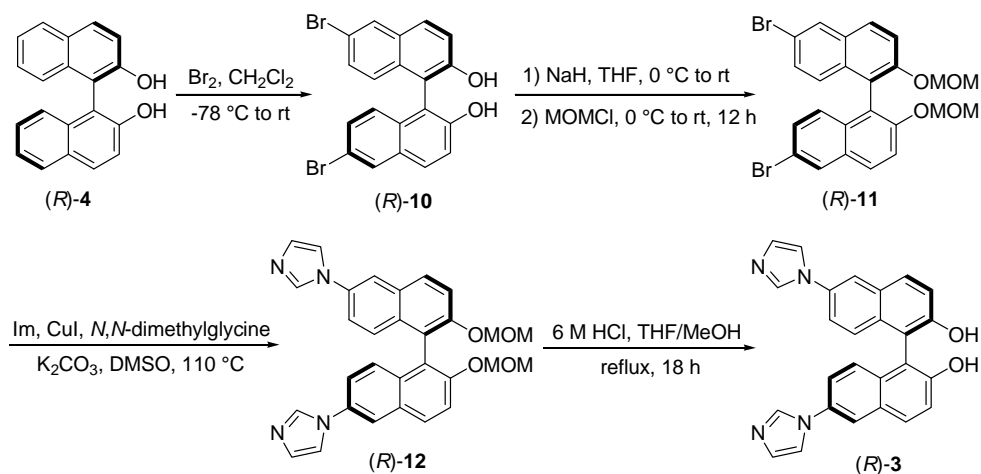

**Scheme S3** Synthesis of the 6,6' -diimidazolyl-substituted BINOL (*R*)-3.

#### (*R*)-6,6' -Bis(1*H*-imidazol-1-yl)-2,2' -dimethoxymethoxy-1,1' -binaphthyl ((*R*)-12)

A flame-dried Schlenk flask was charged with CuI (381 mg, 2.0 mmol), *N,N*-dimethylglycine (412 mg, 4.0 mmol),  $\text{K}_2\text{CO}_3$  (11.04 g, 80 mmol), (*R*)-11 (5.32 g, 10 mmol), imidazole (2.72 g, 40 mmol), and DMSO (15 mL) at room temperature under nitrogen. After being heated at 110 °C for 48 h, the mixture was concentrated under reduced pressure. The resulting residue was then partitioned between water (60 mL) and  $\text{CH}_2\text{Cl}_2$  (120 mL). The organic layer was separated, and the aqueous layer was extracted with  $\text{CH}_2\text{Cl}_2$  (3×30 mL). The combined organic layers were dried over  $\text{Na}_2\text{SO}_4$  and evaporated in *vacuo*. The crude product was purified by chromatography on a silica gel column

eluting CH<sub>2</sub>Cl<sub>2</sub>/MeOH (20:1 to 15:1). (*R*)-**12** was obtained in 84% yield (4.26 g) as a yellow solid. M.p. 77-78 °C; [α]<sub>D</sub><sup>20</sup> = -5.0 (c = 0.50, CH<sub>2</sub>Cl<sub>2</sub>); <sup>1</sup>H NMR (400 MHz, CDCl<sub>3</sub>): δ 3.31 (s, 6H), 4.94 (dd, *J* = 6.8 Hz, 7.2 Hz, 4H), 7.14-7.22 (m, 6H), 7.60 (d, *J* = 9.2 Hz, 2H), 7.79 (d, *J* = 2.0 Hz, 2H), 7.86 (s, 2H), 7.92 (d, *J* = 9.2 Hz, 2H) ppm; <sup>13</sup>C NMR (150 MHz, CDCl<sub>3</sub>): δ 56.0, 95.0, 118.4, 118.5, 119.3, 120.6, 120.9, 127.4, 129.6, 129.8, 130.4, 132.8, 133.4, 135.8, 153.2 ppm; HRMS (ESI): calcd for C<sub>30</sub>H<sub>27</sub>N<sub>4</sub>O<sub>4</sub> [M+H]<sup>+</sup>: 507.2032, found: 507.2040.

**(*R*)-6,6' -Bis(1*H*-imidazol-1-yl)-1,1' -bi-2-naphthol ((*R*)-**3**)**

Aqueous HCl (6 *M*, 10 mL) was added to a solution of (*R*)-**12** (3.04 g, 6.0 mmol) in THF (40 mL) and methanol (20 mL). The resulting solution was refluxed for 18 h until the conversion of (*R*)-**12** was complete. The solution was then cooled to room temperature and neutralized by addition of saturated aqueous Na<sub>2</sub>CO<sub>3</sub> solution. After the resulting mixture was stirred for a further 12 h and volatiles were removed under reduced pressure. The aqueous phase was extracted with CH<sub>2</sub>Cl<sub>2</sub> (3×100 mL). The combined organic layers were dried over Na<sub>2</sub>SO<sub>4</sub> and concentrated in *vacuo*. The resulting residue was purified by flash column chromatography on silica gel eluting with CH<sub>2</sub>Cl<sub>2</sub>/MeOH (18:1 to 10:1) to give (*R*)-**3** (2.23 g, 89%) as a pale-yellow solid. M.p. >300 °C; [α]<sub>D</sub><sup>20</sup> = +15.0 (c = 0.50, DMSO); <sup>1</sup>H NMR (400 MHz, DMSO-*d*<sub>6</sub>): δ 7.06 (d, *J* = 9.2 Hz, 2H), 7.13 (s, 2H), 7.43 (d, *J* = 8.8 Hz, 2H), 7.49 (dd, *J* = 2.0 Hz, 2.4 Hz, 2H), 7.74 (s, 2H), 7.95 (d, *J* = 9.2 Hz, 2H), 8.13 (d, *J* = 2.4 Hz, 2H), 8.24 (s, 2H), 9.47 (s, 2H) ppm; <sup>13</sup>C NMR (100 MHz, DMSO-*d*<sub>6</sub>): δ 115.8, 118.9, 119.0, 120.4, 120.6, 126.7, 128.6, 129.4, 130.1, 132.3, 133.2, 136.2, 154.0 ppm; HRMS (ESI): calcd for C<sub>26</sub>H<sub>19</sub>N<sub>4</sub>O<sub>2</sub> [M+H]<sup>+</sup>: 419.1508, found: 419.1510; Anal. Calcd. for : C, 74.63; H, 4.34; N, 13.39. Found: C, 74.32; H, 4.31; N, 13.12

### III. General procedure for the preparation of organic crystals (*R*)-1-3

At elevated temperature, (*R*)-1-3 (50 mg) was dissolved in a DMF solution (2 mL) with constant stirring to give a light yellow solution. Then the mixture was filtered to remove a trace amount of undissolved substance. Colorless block crystals (*R*)-1-3 suitable for X-ray analysis were obtained by slow diffusion of 1,4-dioxane into the corresponding DMF solution at ambient temperature after several days (yields: 70-75%).

### IV. Single-crystal X-ray diffraction determination and refinement

X-Ray single-crystal diffraction data for (*R*)-1-3 were collected on a Bruker SMART 1000 CCD areadetector diffractometer at 100 K with graphite monochromated Mo K  $\alpha$  radiation ( $\lambda = 0.71073$  Å) with  $\omega$  scan mode. All the structures were solved by direct methods using the SHELXS program and refined by full-matrix least-squares methods with SHELXL.<sup>5</sup> All non-hydrogen atoms were located in successive difference Fourier syntheses and refined with anisotropic thermal parameters on  $F^2$ . Hydrogen atoms were included in calculated positions and refined with constrained thermal parameters riding on their parent atoms. The guest molecules of (*R*)-3 could not be located in the difference map because of disorder. The crystal parameters, data collection and refinement results for the three compounds are summarized in Table S1.

**Table S1** Crystallographic Data for Crystals (*R*)-1-3

|                                 | ( <i>R</i> )-1                                                | ( <i>R</i> )-2                                                | ( <i>R</i> )-3                                                |
|---------------------------------|---------------------------------------------------------------|---------------------------------------------------------------|---------------------------------------------------------------|
| Chemical formula                | C <sub>26</sub> H <sub>18</sub> N <sub>4</sub> O <sub>2</sub> | C <sub>33</sub> H <sub>33</sub> N <sub>5</sub> O <sub>5</sub> | C <sub>26</sub> H <sub>18</sub> N <sub>4</sub> O <sub>2</sub> |
| Formula weight (M)              | 418.44                                                        | 579.64                                                        | 418.44                                                        |
| Temperature (K)                 | 297(2)                                                        | 100(2)                                                        | 297(2)                                                        |
| Wavelength (Å)                  | 0.71073                                                       | 0.71073                                                       | 0.71073                                                       |
| Crystal system                  | Orthorhombic                                                  | Orthorhombic                                                  | Tetragonal                                                    |
| Space group                     | <i>P</i> 21 21 2                                              | <i>P</i> 21 21 21                                             | <i>P</i> 43                                                   |
| Crystal size (mm <sup>3</sup> ) | 0.75×0.50×0.17                                                | 0.44×0.42×0.38                                                | 0.60×0.58×0.48                                                |



|                                          |                |                |                |
|------------------------------------------|----------------|----------------|----------------|
| a (Å)                                    | 27.513(3)      | 9.2610(3)      | 11.950(2)      |
| b (Å)                                    | 12.2721(11)    | 16.4271(5)     | 11.950(2)      |
| c (Å)                                    | 12.3143(11)    | 19.8316(4)     | 21.080(6)      |
| $\alpha$ (°)                             | 90             | 90             | 90             |
| $\beta$ (°)                              | 90             | 90             | 90             |
| $\gamma$ (°)                             | 90             | 90             | 90             |
| Volume (Å <sup>3</sup> )                 | 4157.8(7)      | 3017.01(15)    | 3010.3(12)     |
| Z                                        | 6              | 4              | 4              |
| Calculated density (g cm <sup>-3</sup> ) | 1.003          | 1.276          | 0.923          |
| $\mu$ (mm <sup>-1</sup> )                | 0.065          | 0.088          | 0.060          |
| Reflections collected                    | 23774          | 22393          | 13487          |
| Independent reflections                  | 4556           | 5247           | 5400           |
| $R_{\text{int}}$                         | 0.0722         | 0.1015         | 0.1045         |
| F(000)                                   | 1308           | 1224           | 872            |
| GOF                                      | 1.125          | 1.090          | 1.101          |
| $R_1, wR_2$ [ $I > 2 \sigma(I)$ ]        | 0.0844, 0.2112 | 0.0624, 0.1703 | 0.0770, 0.2107 |
| $R_1, wR_2$ (all data)                   | 0.1438, 0.2554 | 0.0694, 0.1774 | 0.0838, 0.2197 |

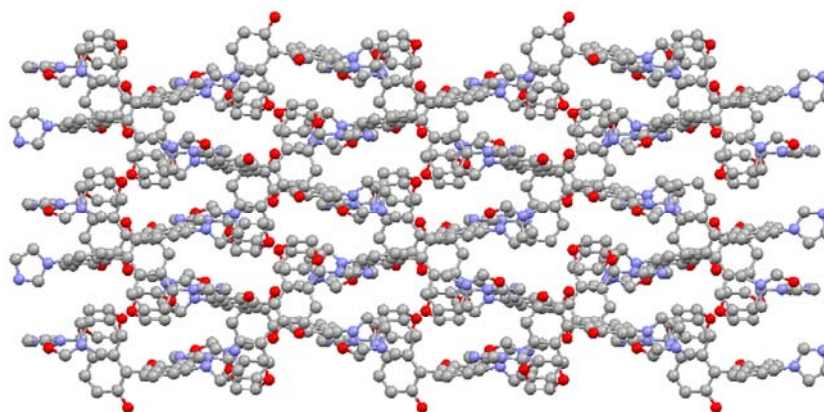

**Fig. S1** 2-D network layer of (*R*)-**2** viewed along the *b*-axis. Color code: C, dark gray; N, blue; O, red; H atoms were omitted for clarity. DMF and 1,4-dioxane molecules were positioned in the network.

## V. Powder X-ray diffraction analysis of (*R*)-1-3

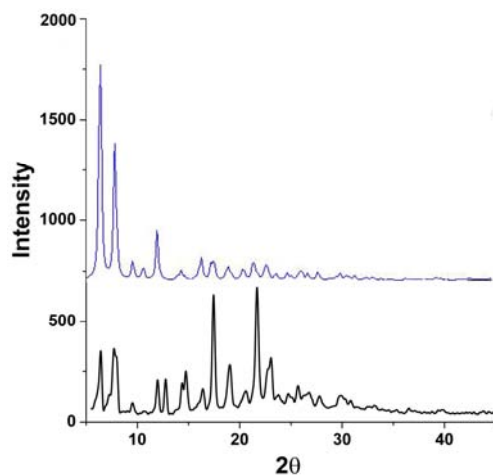

**Fig. S2** Comparison of powder X-ray diffraction patterns of (*R*)-1: the top and bottom patterns correspond to the simulated and experimental results, respectively.

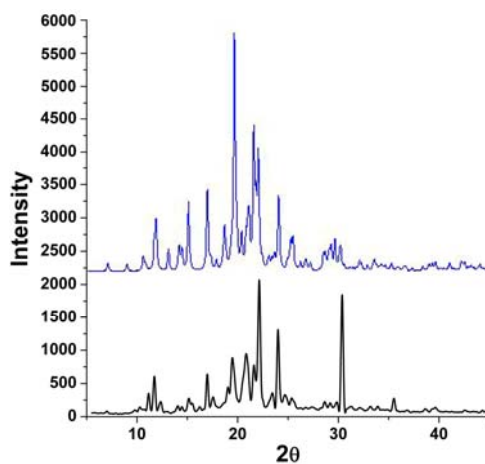

**Fig. S3** Comparison of powder X-ray diffraction patterns of (*R*)-2: the top and bottom patterns correspond to the simulated and experimental results, respectively.

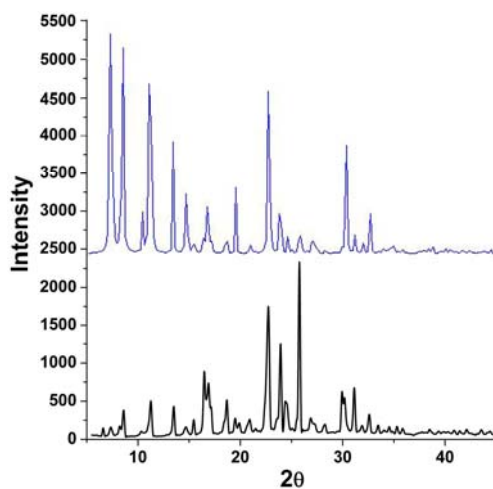

**Fig. S4** Comparison of powder X-ray diffraction patterns of (*R*)-3: the top and bottom patterns correspond to the simulated and experimental results, respectively.

## VI. References

- (1) (a) H. Gilman, J. A. Beel, C. G. Brannen, M. W. Bullock, G. E. Dunn and L. S. Miller, *J. Am. Chem. Soc.* 1949, **71**, 1499; (b) H. Gilman and A. H. Haubein, *J. Am. Chem. Soc.* 1944, **66**, 1515.
- (2) Q.-S. Lu, L. Dong, J. Zhang, J. Li, L. Jiang, Y. Huang, S. Qin, C.-W. Hu and X.-Q. Yu, *Org. Lett.* 2009, **11**, 669.
- (3) (a) Q.-S. Hu, V. Pugh, M. Sabat and L. Pu, *J. Org. Chem.* 1999, **64**, 7528; (b) P. Saravanan and V. K. Singh, *Tetrahedron Lett.* 1999, **40**, 2611.
- (4) M.-H. Xu, J. Lin, Q.-S. Hu and L. Pu, *J. Am. Chem. Soc.* 2002, **124**, 14239.
- (5) G. M. Scheldrick, *SHELX-97 and SHELXL-97, Program for Solution and Refinement of Crystal Structures*; University of Göttingen: Germany, 1997.

## VII. Copies of $^1\text{H}$ and $^{13}\text{C}$ NMR spectra of (*R*)-1-3, 9 and 12

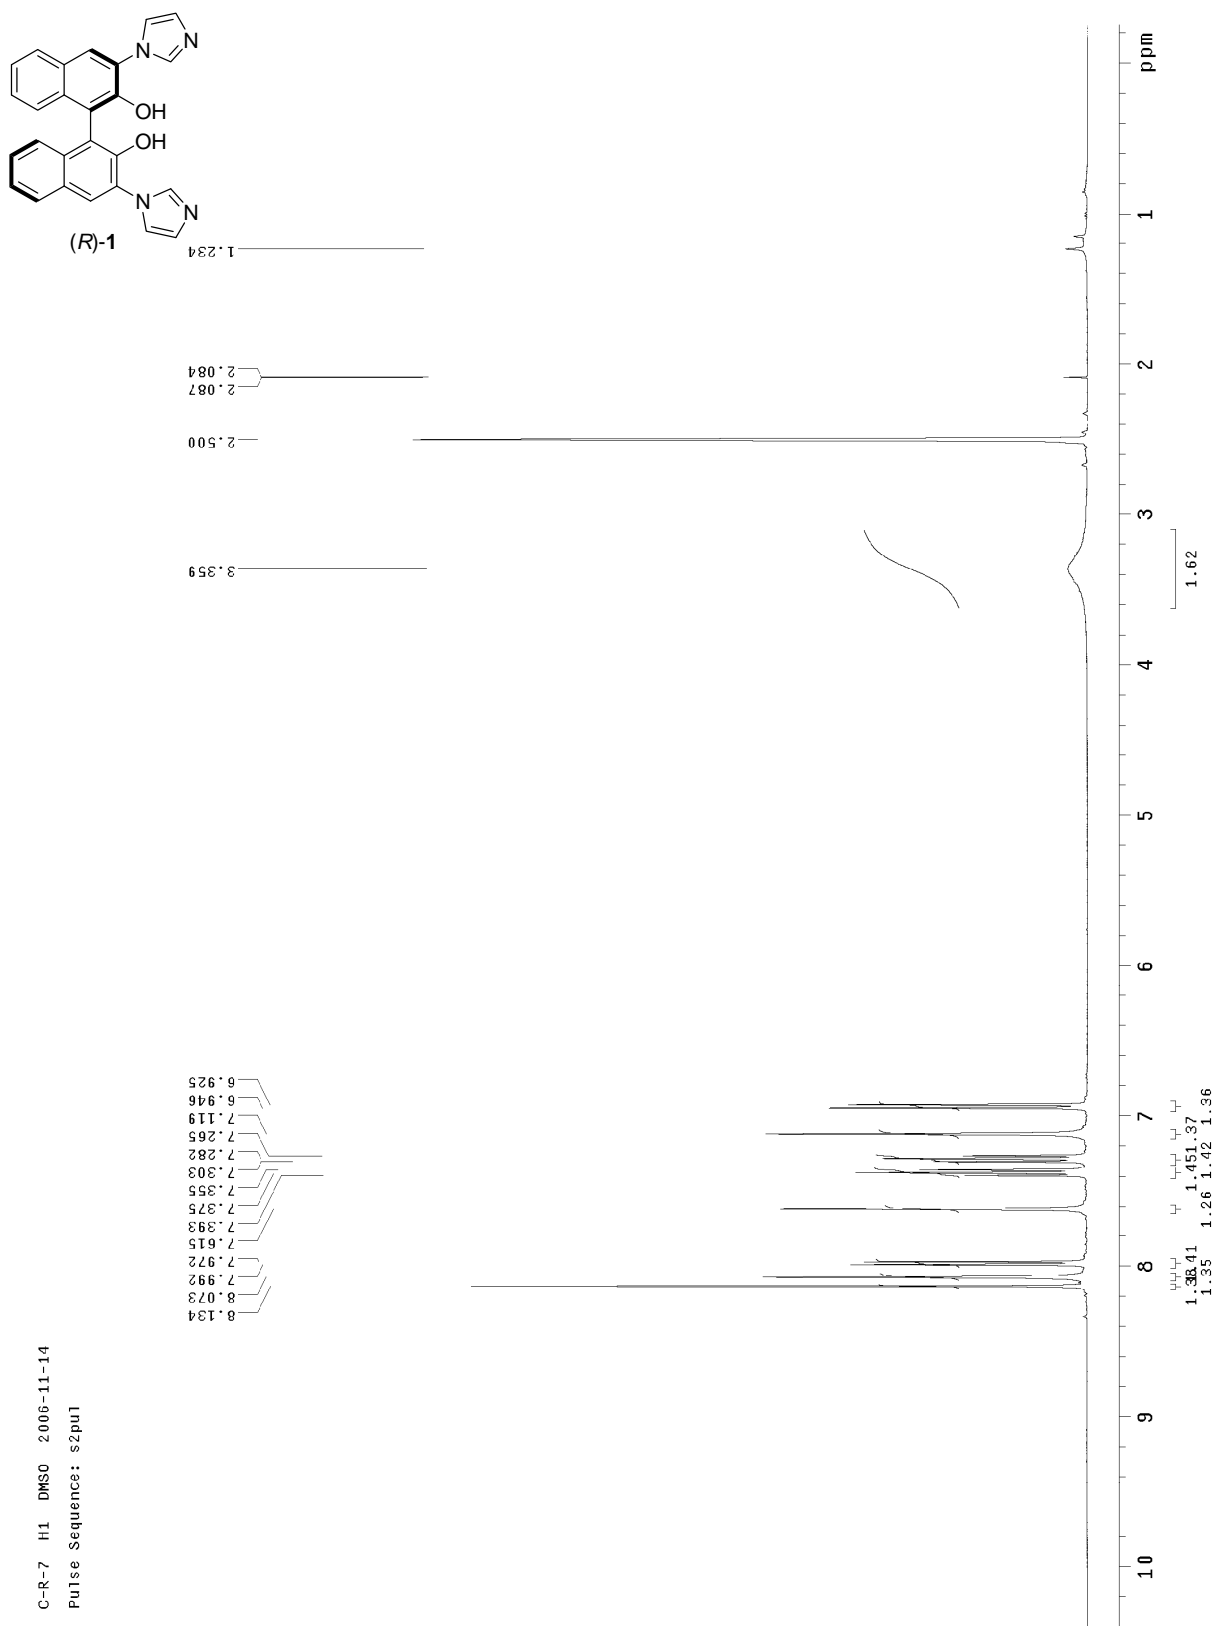

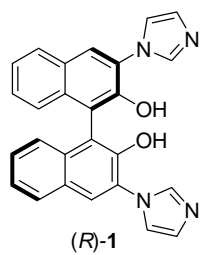

39.917  
39.779  
39.642  
39.500  
39.362  
39.221  
39.083

148.412  
137.723  
135.036  
132.859  
128.138  
127.871  
127.822  
126.702  
124.108  
123.639  
121.474  
120.811  
116.380

YdS-8  
Pulse Sequence: s2pu1

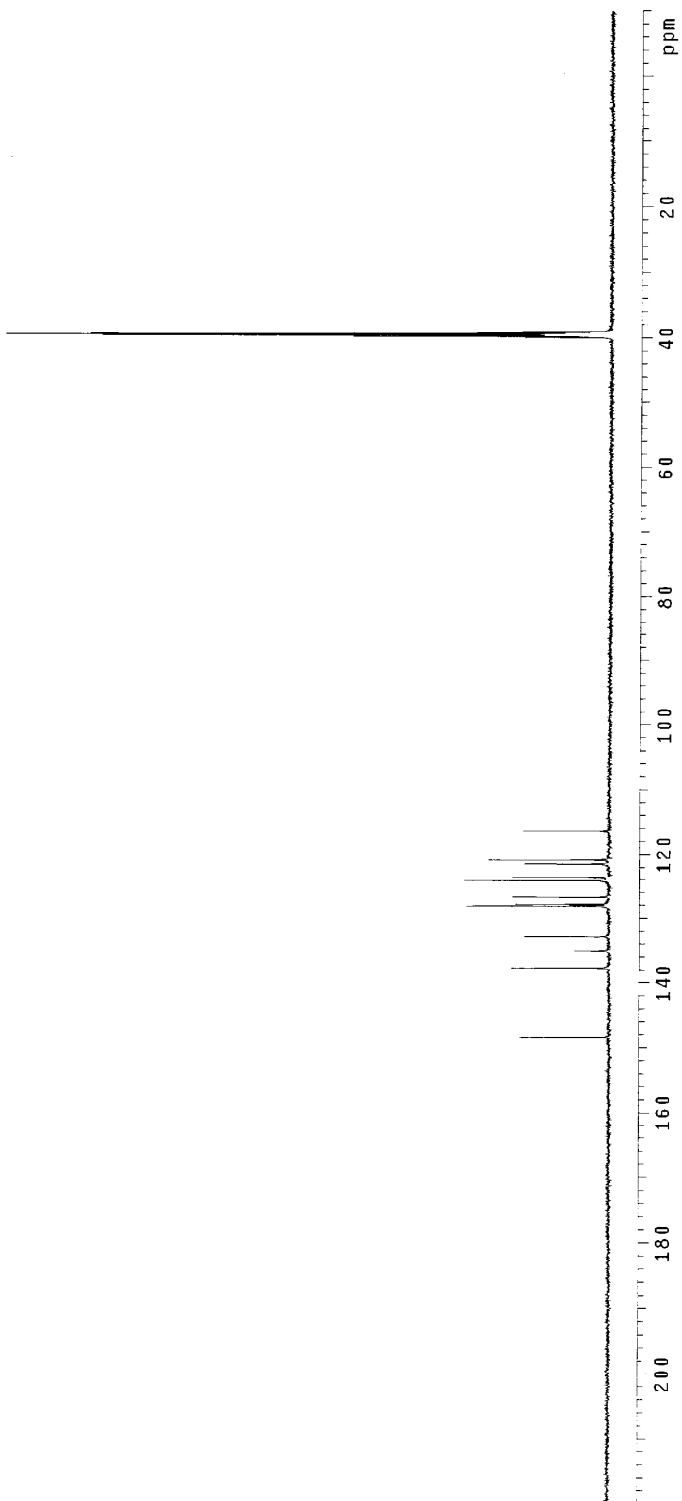

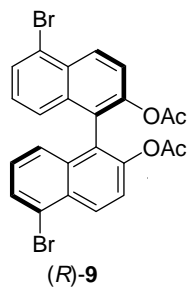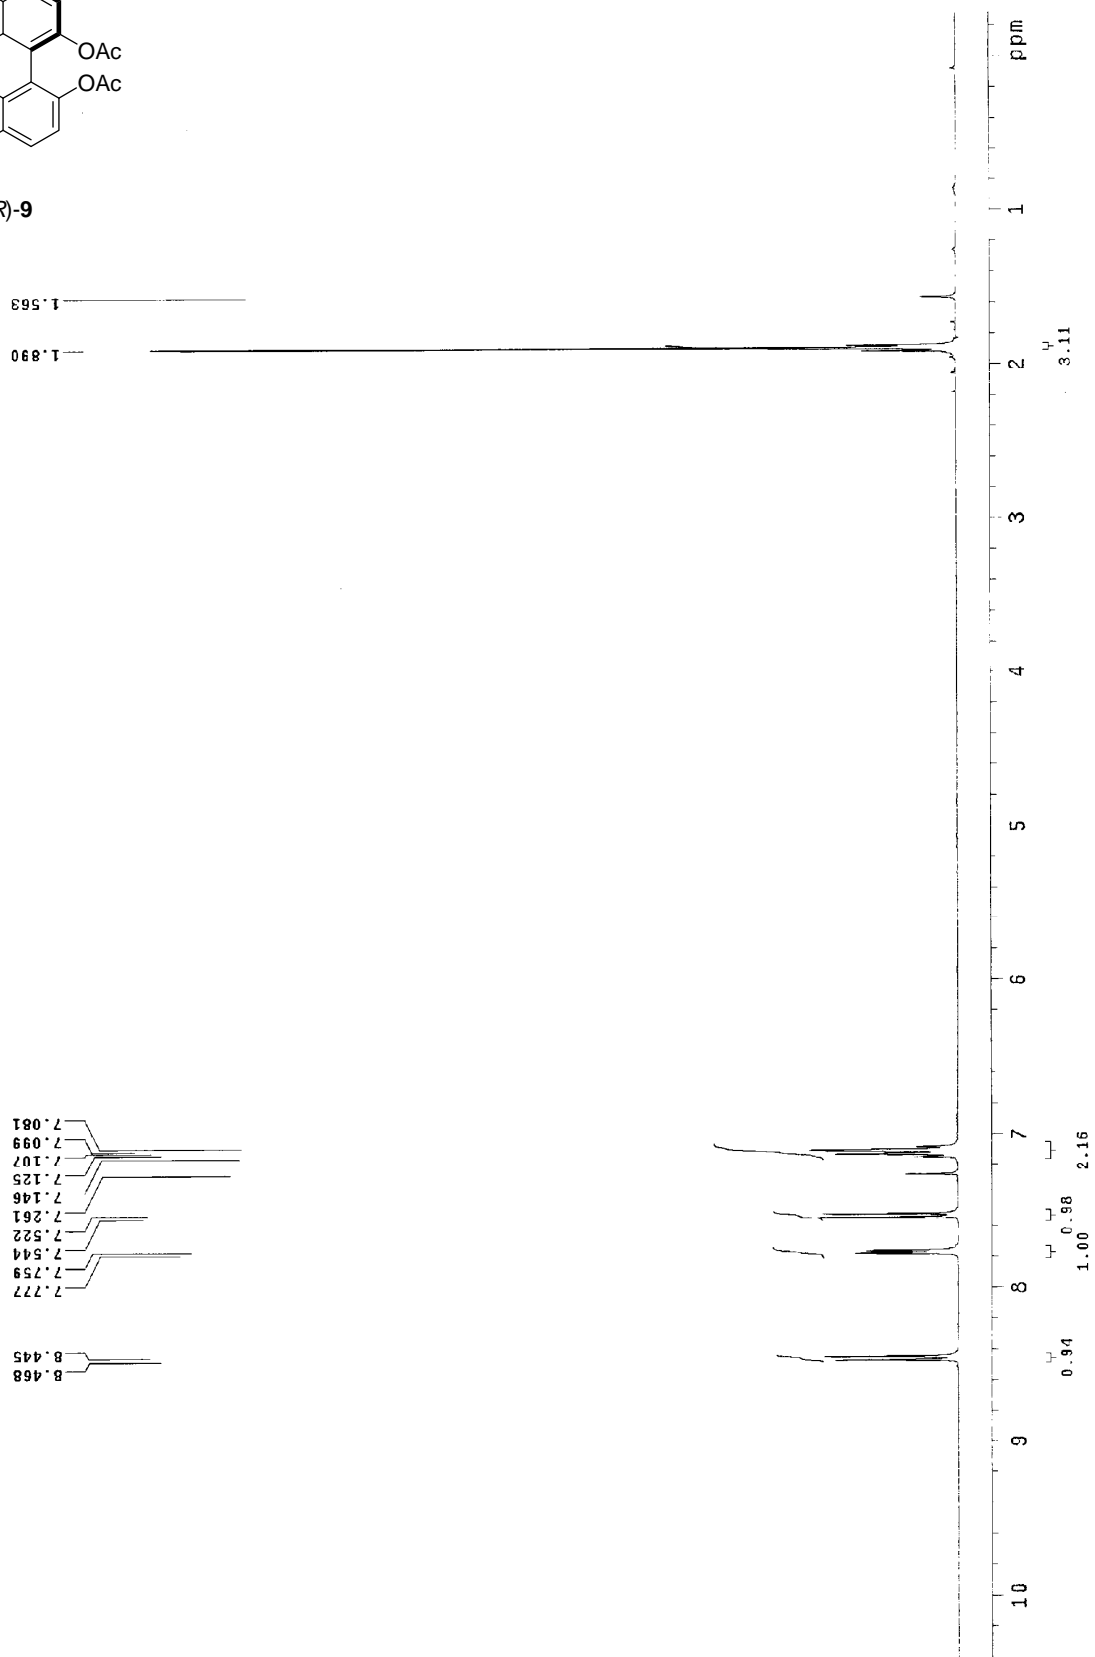

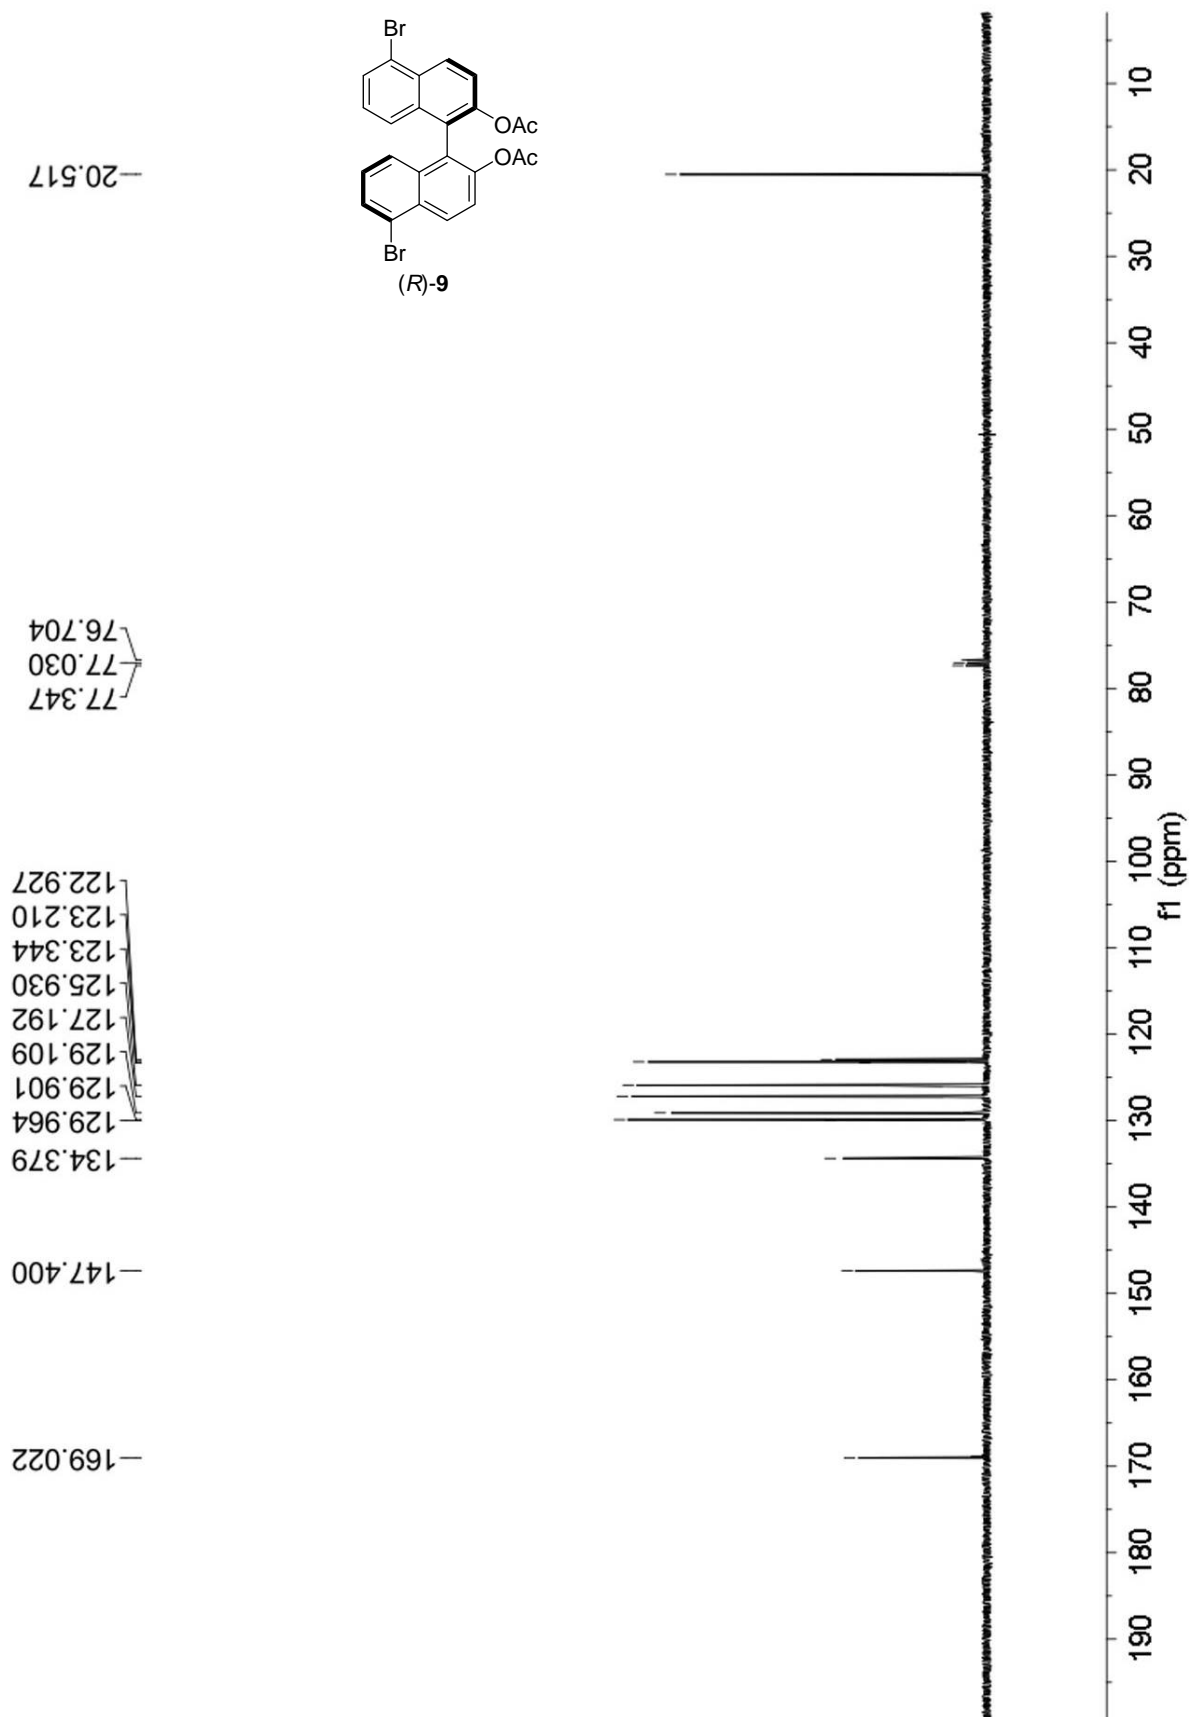

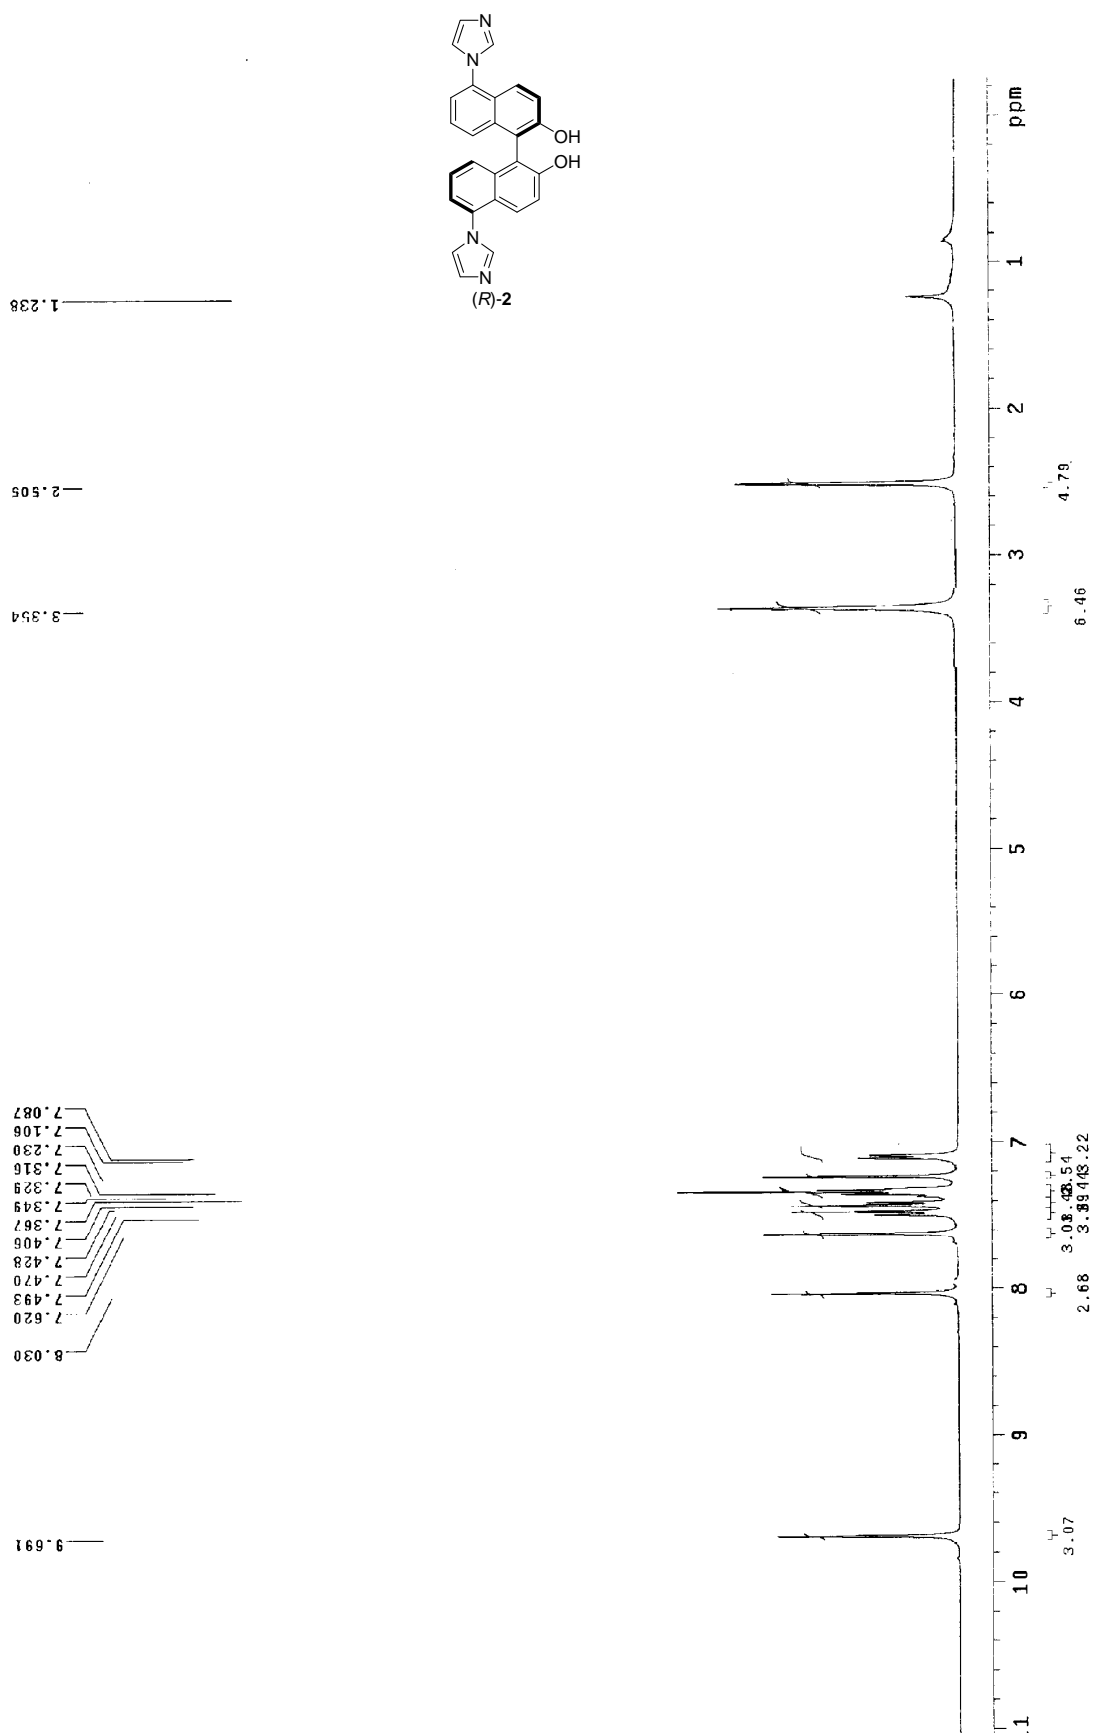



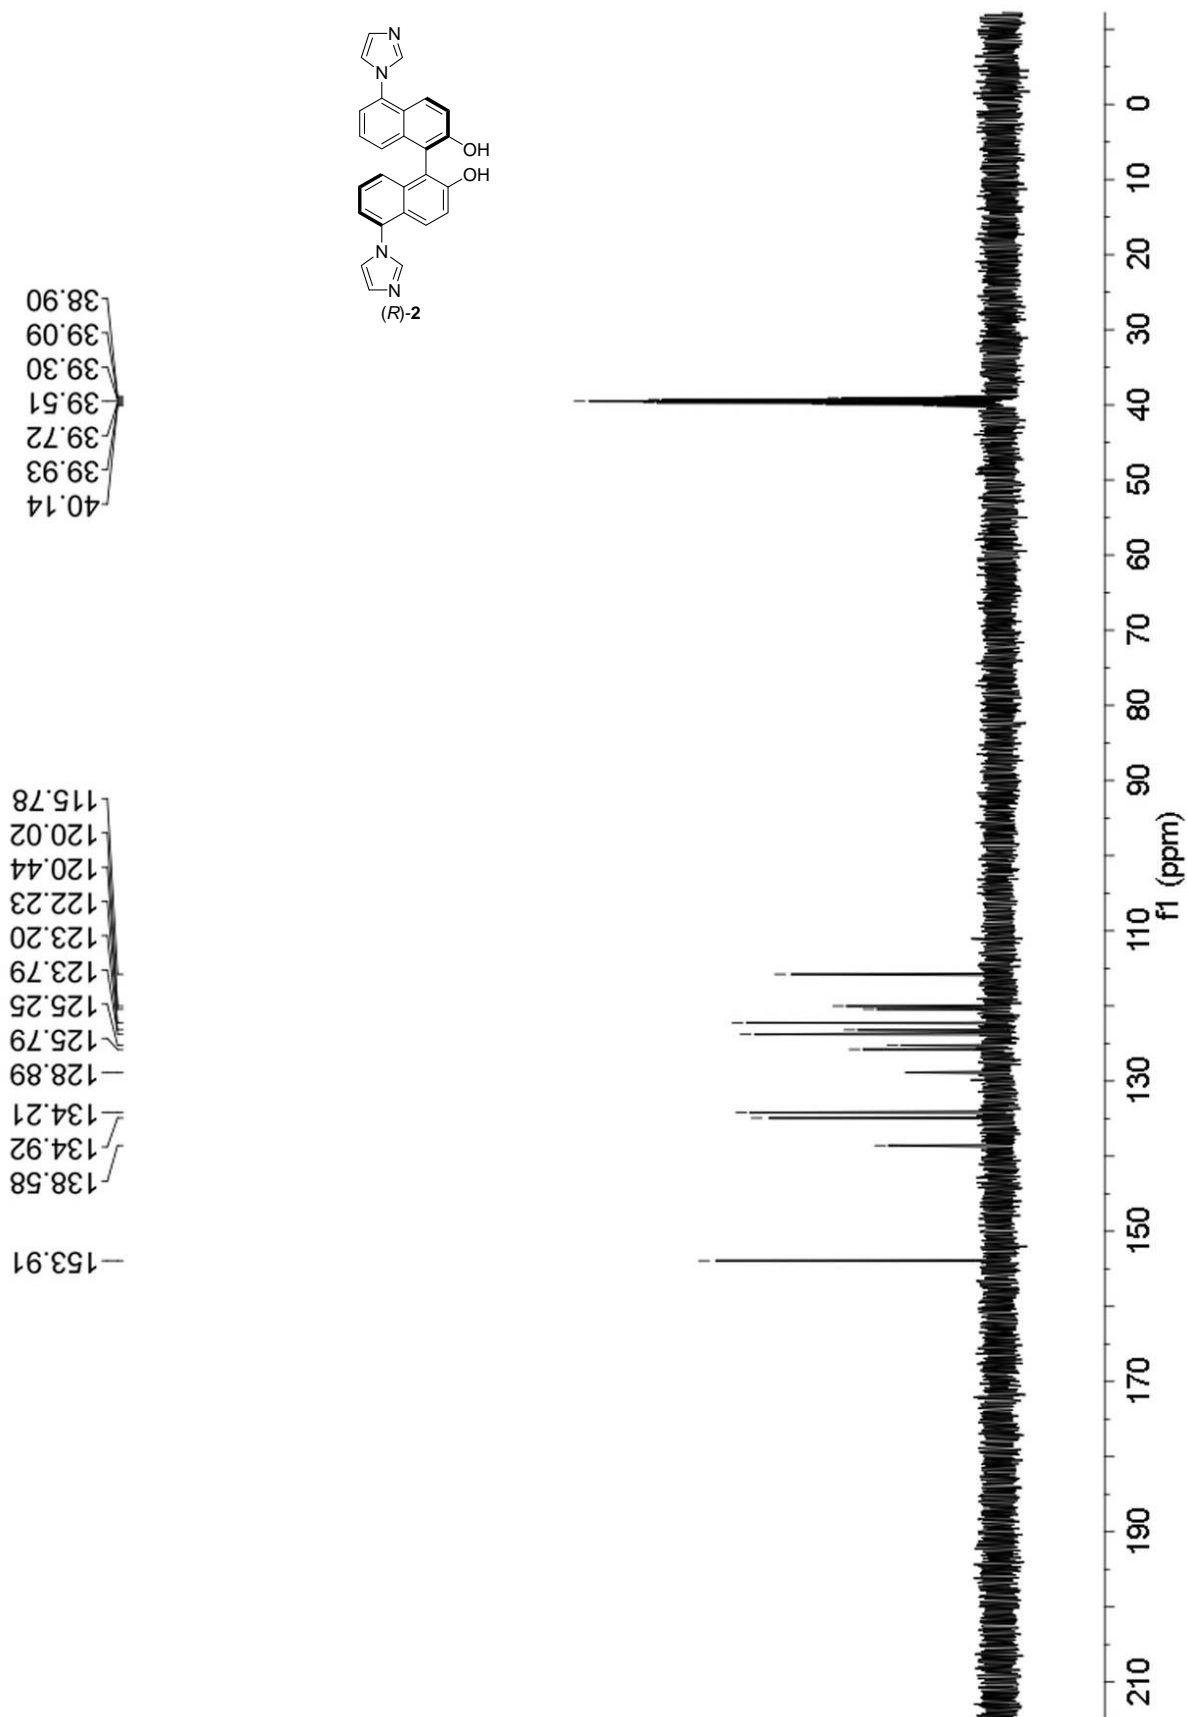

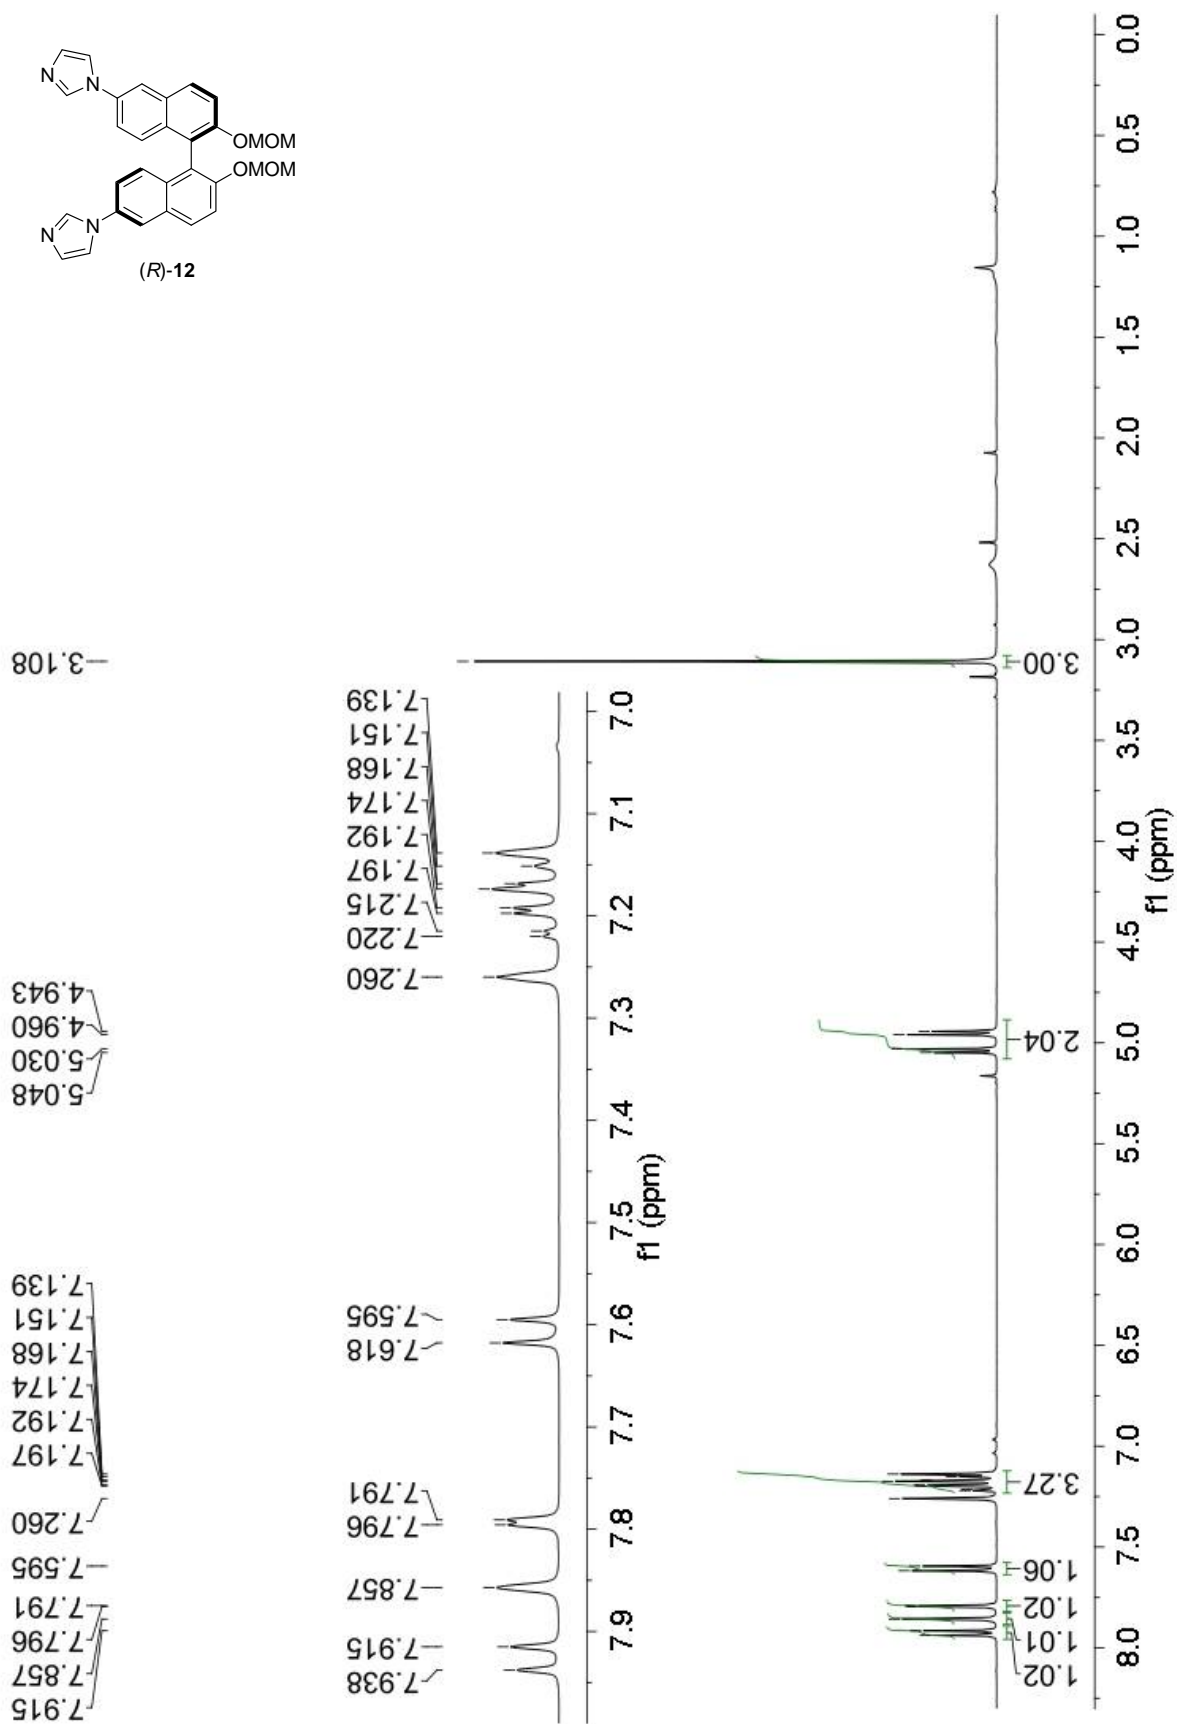

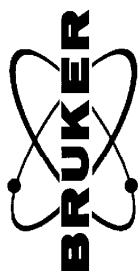

Current Data Parameters  
 NAME 2010-01-25 yang11-6-OMOM-1M  
 EXPNO 1  
 PROCNO 1

F2 - Acquisition Parameters  
 Date\_ 20100125  
 Time 9.50

INSTRUM spect  
 PROBHD 5 mm PAXI 1H/  
 PULPROG zgpg30  
 TD 65536  
 SOLVENT CDCl3  
 NS 384  
 DS 4  
 SWH 36067.600 Hz  
 FIDRES 0.5560091 Hz  
 AQ 0.9088159 sec  
 RG 181  
 WC 13.867 usec  
 DE 6.50 usec  
 TE 300.0 K  
 D1 2.00000000 sec  
 d11 0.03000000 sec  
 DELTA 1.49999998 sec  
 TD0 1

===== CHANNEL f1 =====  
 NUC1 13C  
 P1 11.50 usec  
 PL1 -3.00 dB  
 SFO1 150.9178968 MHz

===== CHANNEL f2 =====  
 CPDPRG2 waltz16  
 NUC2 1H  
 PCPD2 80.00 usec  
 PL2 19.50 dB  
 PL13 19.50 dB  
 PL12 -1.00 dB  
 SFO2 600.1324005 MHz

F2 - Processing parameters  
 SI 32768  
 SF 150.9028090 MHz  
 MEW EM  
 SSB 0  
 LB 1.00 Hz  
 GB 0  
 PC 1.40

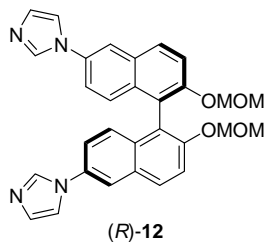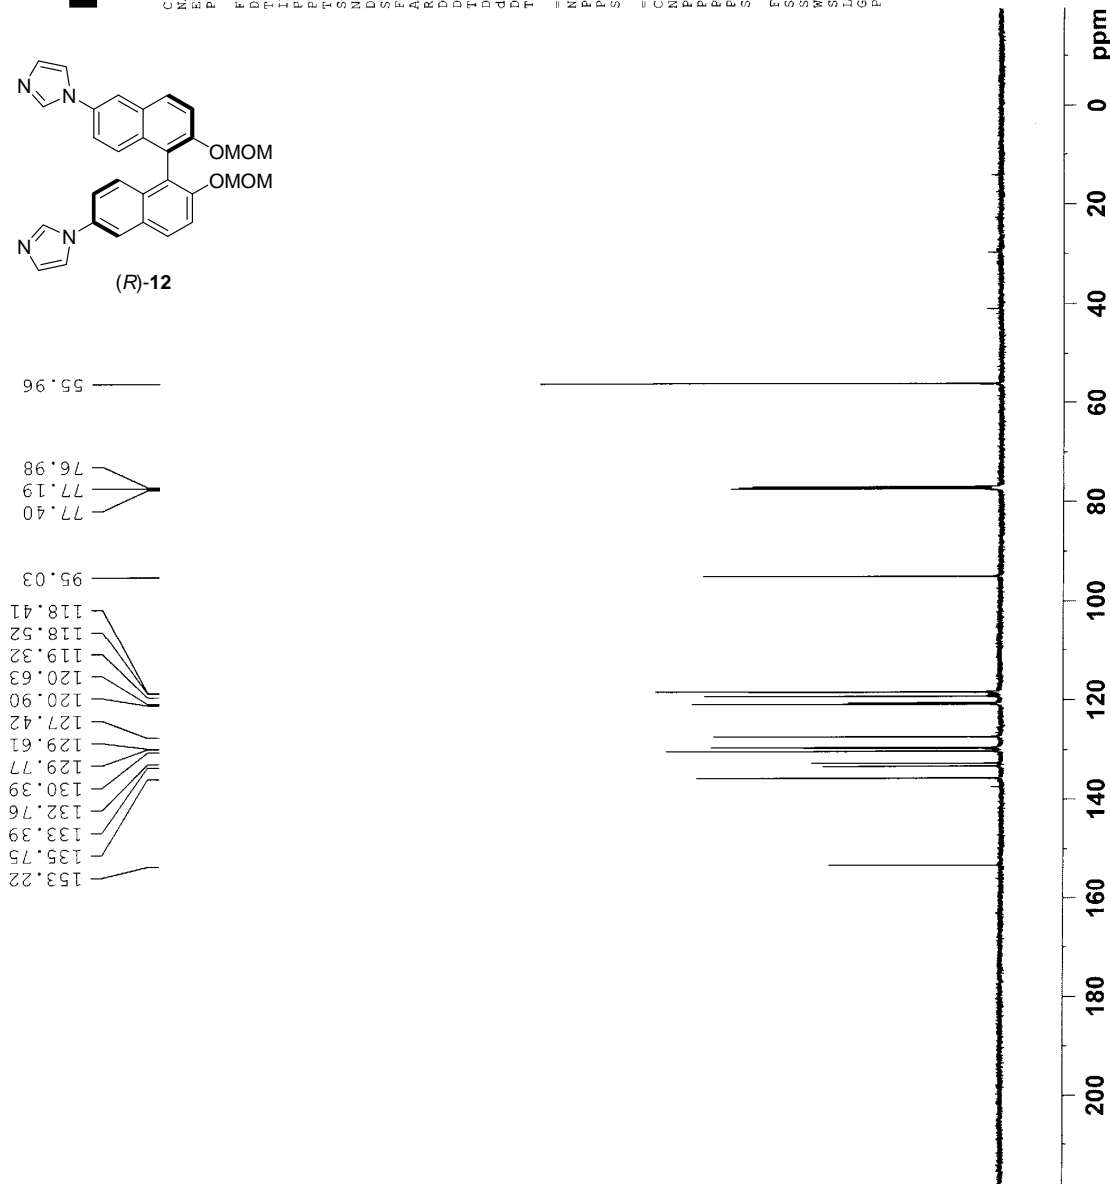

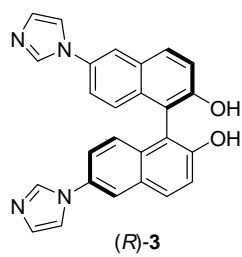

2.508  
2.504

3.357

8.243  
8.138  
8.132  
7.968  
7.945  
7.742  
7.521  
7.515  
7.498  
7.493  
7.447  
7.425  
7.127  
7.081  
7.058

9.470

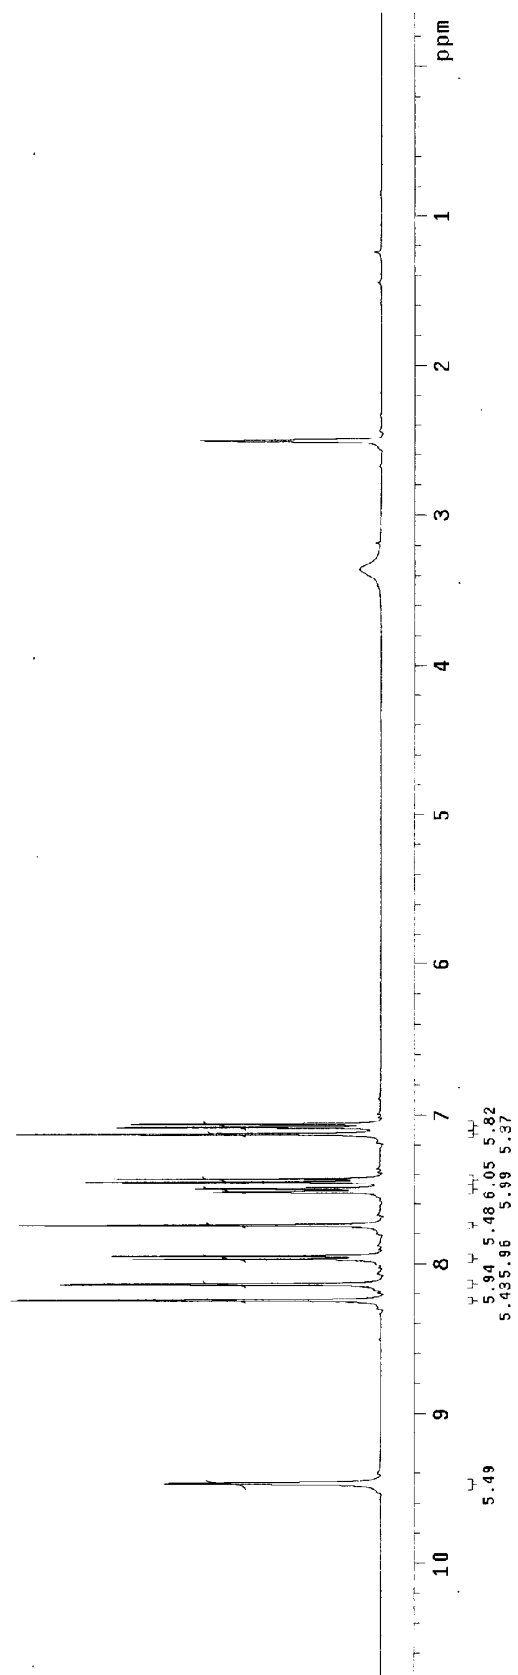

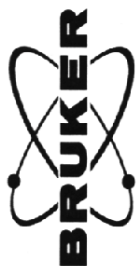

Current Data Parameters  
 NAME: 2010-01-26\_yingli-YL-6,6'-IM  
 EXPNO: 1  
 PROCNO: 1

F2 - Acquisition Parameters

Date\_ 20100126  
 Time 17.43  
 NS 512  
 DS 0  
 SWH 24038.461 Hz  
 FIDRES 0.356798 Hz  
 AQ 1.365706 sec  
 RG 2066  
 DW 20.800 usec  
 DE 6.55 usec  
 TE 300.2 K  
 D1 3.0000000 sec  
 d11 0.0000000 sec  
 DELTA 1.8427000 sec  
 TDO 1

CHANNEL f1

NUC1 13C  
 P1 15.50 usec  
 PL1 -1.00 dB  
 SFO1 100.6228298 MHz

CHANNEL f2

NAME waltz16  
 NUC2 1H  
 PCPD2 60.00 usec  
 PL12 11.35 dB  
 PL13 13.05 dB  
 PL2 2.00 dB  
 SFO2 400.1316005 MHz

F2 - Processing parameters

SF 32768  
 SF 100.6127690 MHz  
 MDW 0  
 SSB 0  
 LB 2.00 Hz  
 GB 0  
 PC 1.40

40.63  
 40.42  
 40.21  
 40.00  
 39.79  
 39.59  
 39.38

154.03  
 136.18  
 133.24  
 132.25  
 130.14  
 129.44  
 128.62  
 126.65  
 120.57  
 120.44  
 118.96  
 118.87  
 115.82

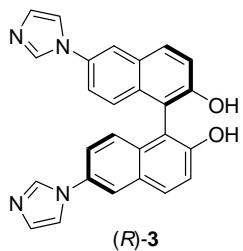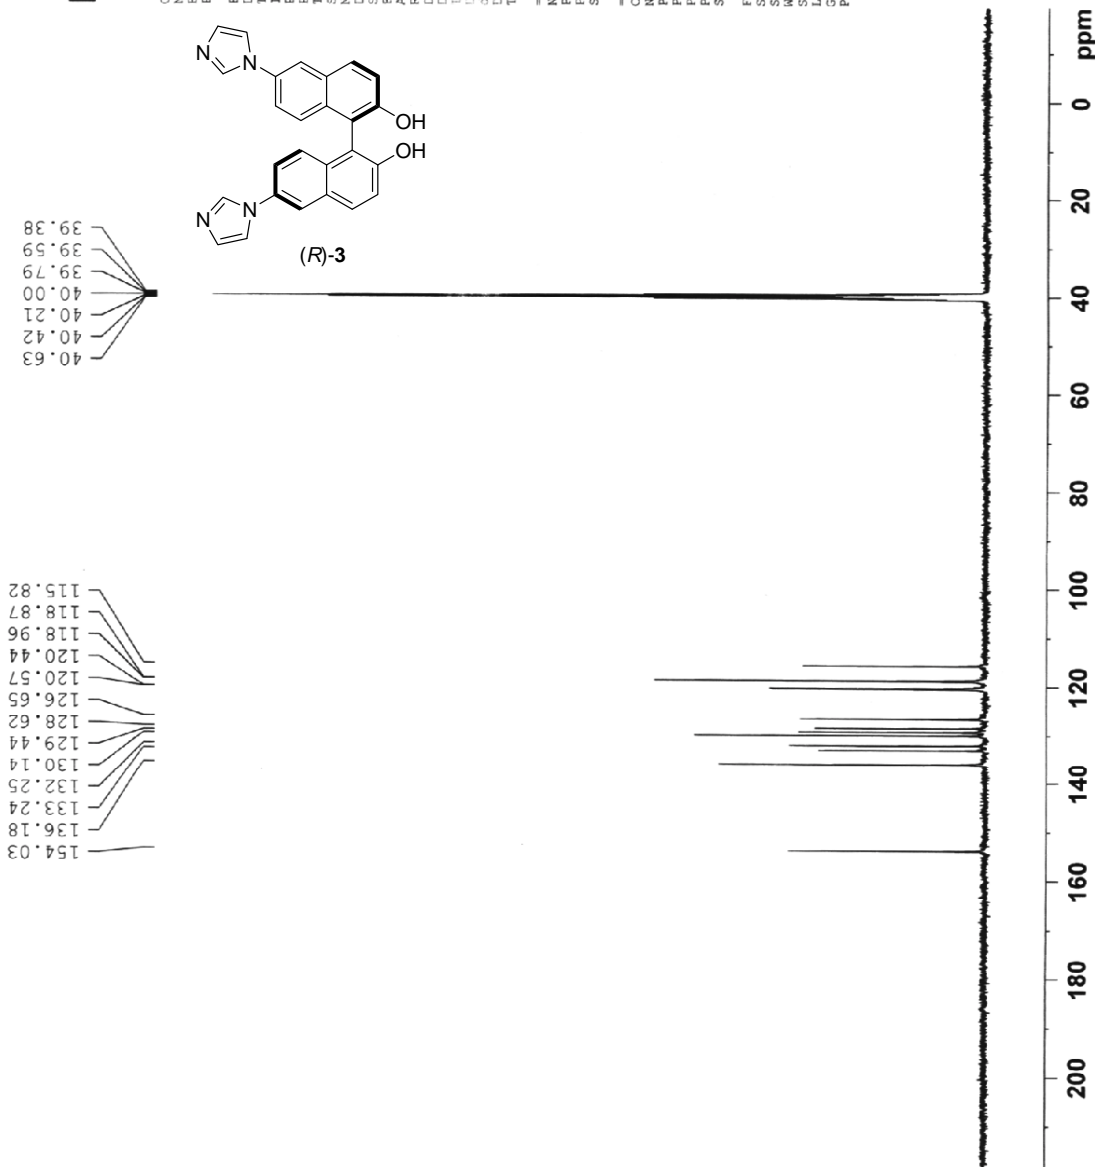

Supplement: c1ob00026h.pdf [file c1ob00026h.pdf]
